# Supplementary material
Source: Springer Nature journal article supplement (https://www.springermedizin.de/resource/supplementary/12879_2011_1925_MOESM3_ESM.pdf/9444022)
Supplement: MOESM3 [file 9444022]

PubMed/EMBASE Search  
n=446

76 Abstracts selected for  
full article review

**370 Abstracts excluded**

- Not laboratory-confirmed RSV, n=124
- Not children aged <5 years, n=46
- Not otherwise healthy children, premature infants with or without CLD, or children with congenital heart disease, n=17
- No residential crowding or multiple risk factor analysis for RSV disease, n=180
- Study population received immunoprophylaxis for RSV disease, n=1
- Duplicates, n=2

**56 Articles excluded after full review**

- No laboratory-confirmed RSV, n=30
- No residential crowding risk factor analysis for RSV disease, n=14
- No data in article, n=2
- Review article or no primary data, n=8
- Study population received immunoprophylaxis for RSV disease, n=2

20 Full articles selected  
for report
